# Supplementary material for: Single-ion magnets with D4d symmetry based on electron-donating β-diketonate Dy(iii) complexes
Source: Royal Society of Chemistry journal article supplement (doi:10.1039/c8nj00636a), 2018-01-01
Supplement: c8nj00636a1.pdf [file c8nj00636a1.pdf]

## Supporting Information

### Single-ion magnets with $D_{4d}$ symmetry based on electron-donating $\beta$ -diketonate Dy(III) complexes

*Xu Yao, Pengfei Yan, Guanghui An, Chao Shi, Yuxin Li and Guangming Li\**

Key Laboratory of Functional Inorganic Material Chemistry (MOE); School of Chemistry and Materials Science; Heilongjiang University; No. 74, Xuefu Road, Nangang District, Harbin, 150080, People's Republic of China; E-mail: gmli@hlju.edu.cn.

#### Scheme S1. Synthesis of complexes 1–4.

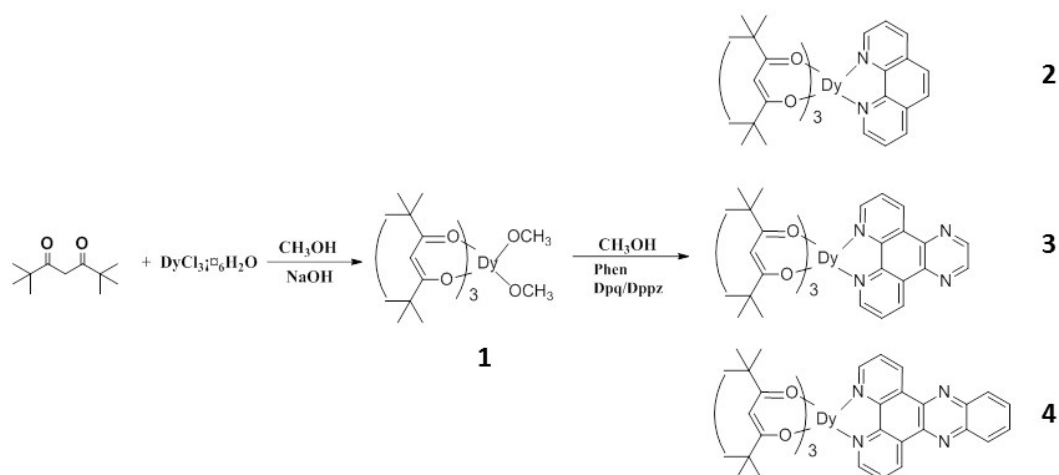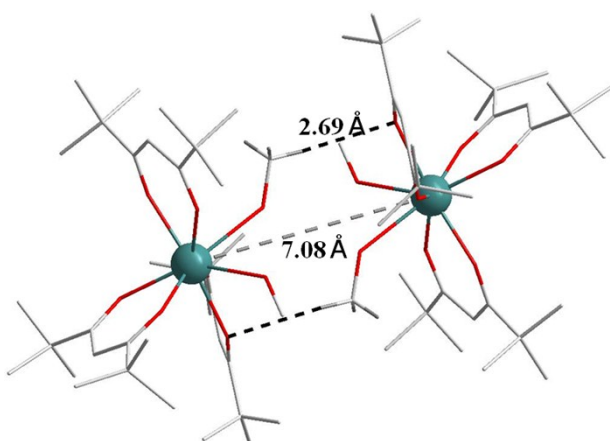

**Figure S1.** The hydrogen bonds interactions between the molecules in complex **1**.

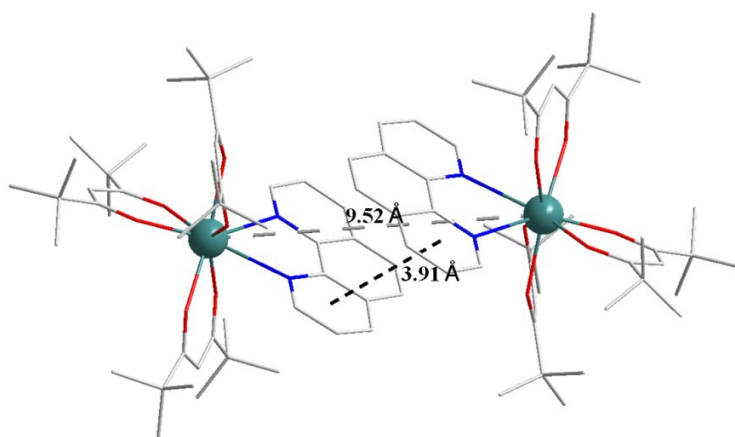

**Figure S2.** The  $\pi$ - $\pi$  stacking between the molecules in complex **2**.

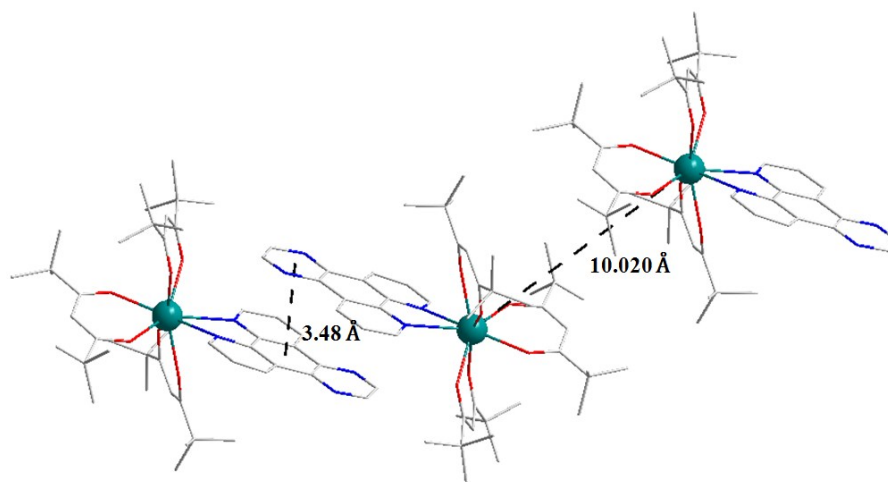

**Figure S3.** The  $\pi$ - $\pi$  stacking between the molecules in complex **3**.

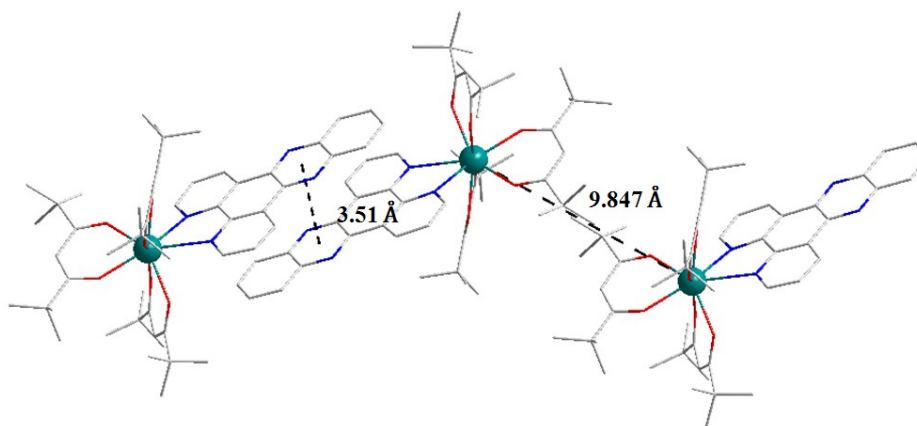

**Figure S4.** The  $\pi$ - $\pi$  stacking between the molecules in complex **4**.

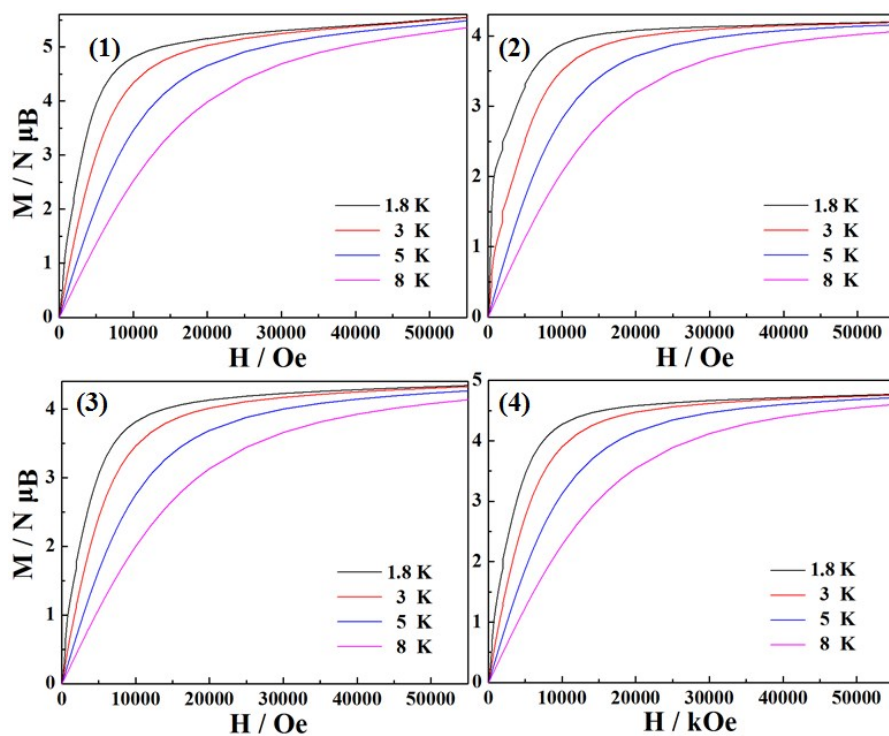

**Figure S5.** M versus H plots at 1.8 K, 3.0 K, 5.0 K and 8.0 K for complexes 1–4.

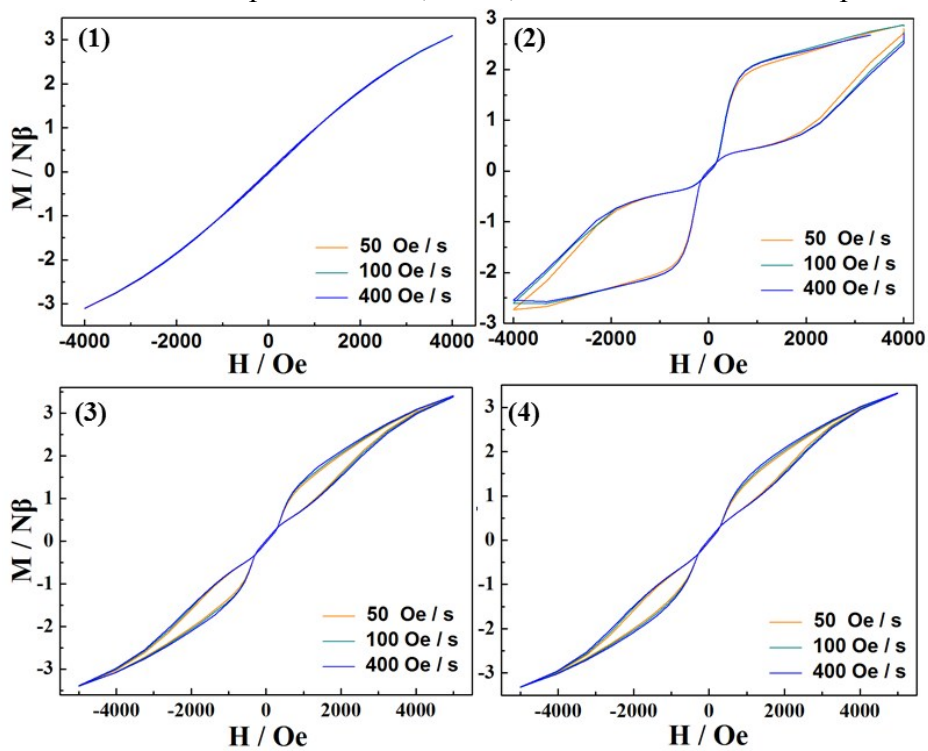

**Figure S6.** Hysteresis loops for the complexes 1–4 at 1.8 K.

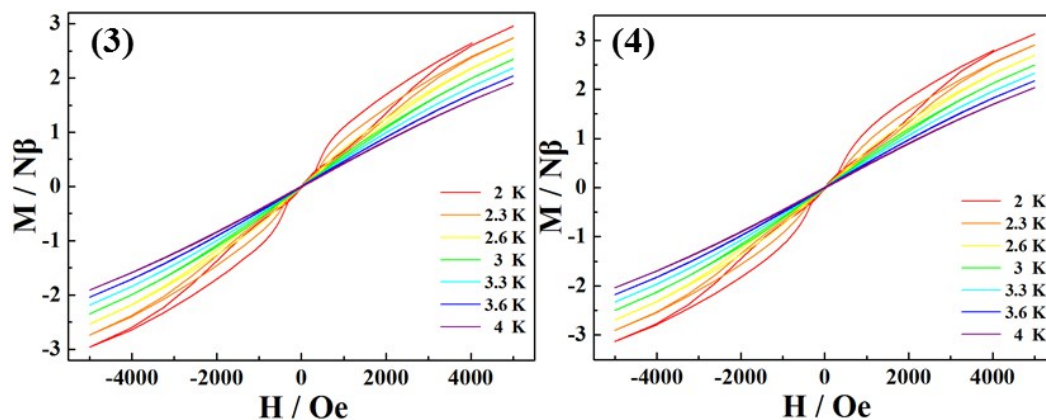

**Figure S7.** Hysteresis loop for complexes **3** and **4** at various temperatures.

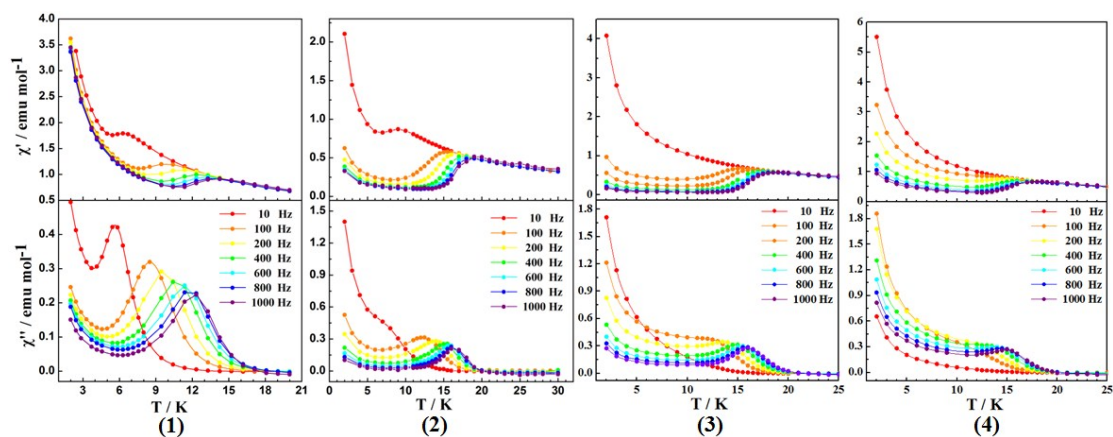

**Figure S8.** Temperature dependence of the in-phase ( $\chi'$ ) and out-of-phase ( $\chi''$ ) ac susceptibility under 0 Oe in the frequency range 10–1000 Hz for complexes **1–4**.

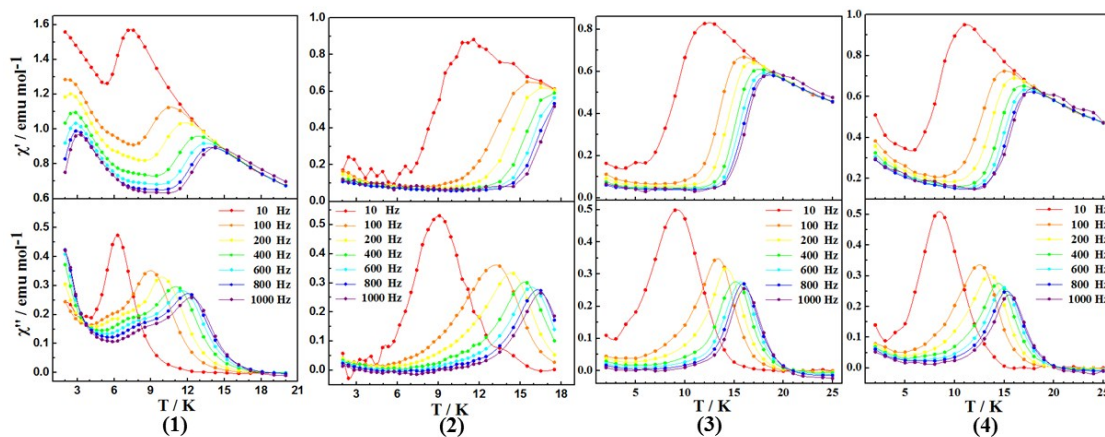

**Figure S9.** Temperature dependence of the in-phase ( $\chi'$ ) and out-of-phase ( $\chi''$ ) ac susceptibility under 1000 Oe in the frequency range 1–1000 Hz complexes **1–4**.

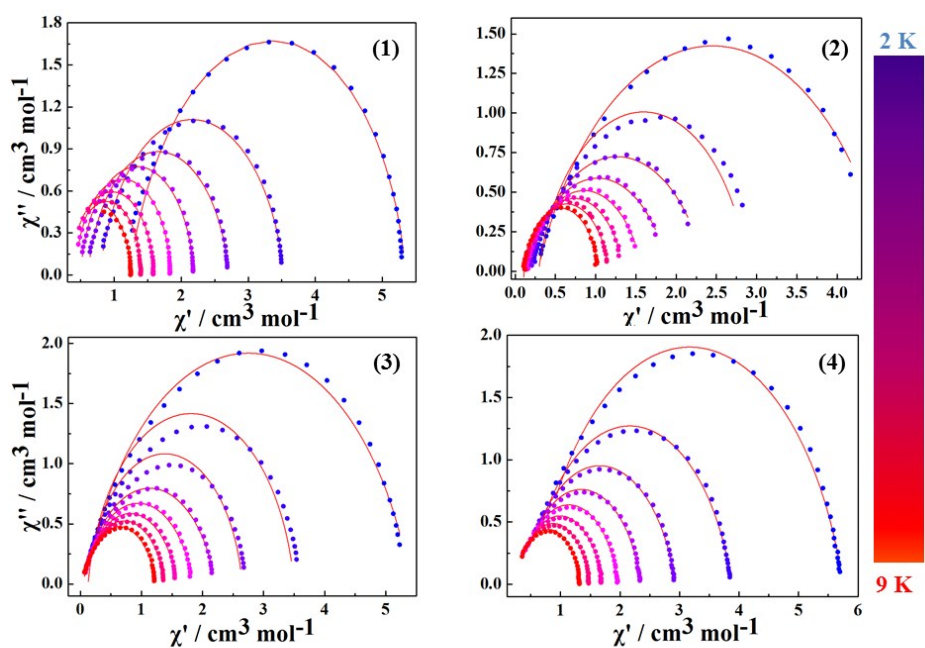

**Figure S10.** Cole–Cole plots measured at 2–9 K in 0 dc field for complexes 1–4.

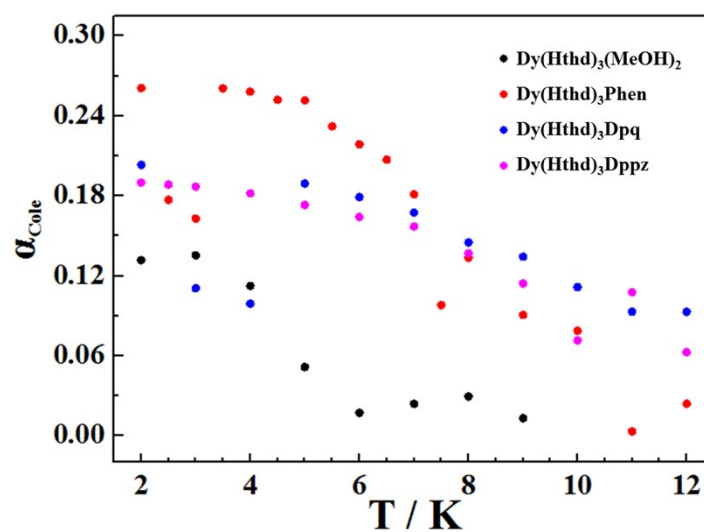

**Figure S11.** Fitted broadness parameters  $\alpha_{\text{Cole}}$  as functions of temperature for complexes 1–4.

**Table S1.** Selected bond lengths (Å) and angles (°) for complexes **1–4**.

| <b>1</b>        |            | <b>2</b>        |           |
|-----------------|------------|-----------------|-----------|
| Dy(1)–O(1)      | 2.293(3)   | Dy(1)–O(1)      | 2.324(2)  |
| Dy(1)–O(2)      | 2.269(3)   | Dy(1)–O(2)      | 2.277(2)  |
| Dy(1)–O(3)      | 2.356(3)   | Dy(1)–O(3)      | 2.325(2)  |
| Dy(1)–O(4)      | 2.280(3)   | Dy(1)–O(4)      | 2.355(2)  |
| Dy(1)–O(5)      | 2.326(3)   | Dy(1)–O(5)      | 2.317(2)  |
| Dy(1)–O(6)      | 2.318(3)   | Dy(1)–O(6)      | 2.308(2)  |
| Dy(1)–O(7)      | 2.516(4)   | Dy(1)–N(1)      | 2.308(2)  |
| Dy(1)–O(8)      | 2.552(4)   | Dy(1)–N(2)      | 2.308(2)  |
| O(2)–Dy(1)–O(1) | 73.17(11)  | O(2)–Dy(1)–O(1) | 73.30(7)  |
| O(3)–Dy(1)–O(1) | 78.26(11)  | O(3)–Dy(1)–O(1) | 79.45(8)  |
| O(4)–Dy(1)–O(1) | 116.31(11) | O(4)–Dy(1)–O(1) | 141.37(7) |
| O(5)–Dy(1)–O(1) | 144.49(10) | O(3)–Dy(1)–O(2) | 84.71(8)  |
| O(6)–Dy(1)–O(1) | 82.75(11)  | O(3)–Dy(1)–O(6) | 150.94(8) |
| O(4)–Dy(1)–O(2) | 79.65(11)  | O(4)–Dy(1)–O(5) | 141.70(7) |
| O(4)–Dy(1)–O(3) | 71.74(10)  | O(1)–Dy(1)–O(5) | 76.58(8)  |
| O(2)–Dy(1)–O(3) | 124.28(11) | O(3)–Dy(1)–O(5) | 136.72(8) |
| O(4)–Dy(1)–O(5) | 80.21(11)  | O(4)–Dy(1)–O(2) | 78.51(8)  |
| O(2)–Dy(1)–O(5) | 79.98(12)  | O(3)–Dy(1)–O(2) | 84.71(8)  |
| O(2)–Dy(1)–O(6) | 84.98(12)  | O(6)–Dy(1)–O(2) | 79.46(8)  |
| O(3)–Dy(1)–O(6) | 137.25(10) | O(5)–Dy(1)–O(2) | 121.08(8) |
| <b>3</b>        |            | <b>4</b>        |           |
| Dy(1)–O(1)      | 2.270(2)   | 2.306(4)        |           |
| Dy(1)–O(2)      | 2.311(3)   | 2.271(4)        |           |
| Dy(1)–O(3)      | 2.319(3)   | 2.327(4)        |           |
| Dy(1)–O(4)      | 2.291(2)   | 2.330(4)        |           |
| Dy(1)–O(5)      | 2.331(3)   | 2.320(3)        |           |
| Dy(1)–O(6)      | 2.334(3)   | 2.298(4)        |           |
| Dy(1)–N(1)      | 2.579(3)   | 2.613(5)        |           |
| Dy(1)–N(2)      | 2.614(3)   | 2.589(5)        |           |
| O(2)–Dy(1)–O(1) | 73.47(9)   | 2.298(4)        |           |
| O(3)–Dy(1)–O(1) | 121.75(10) | 140.73(13)      |           |
| O(4)–Dy(1)–O(1) | 79.87(10)  | 78.27(14)       |           |
| O(3)–Dy(1)–O(2) | 76.78(10)  | 79.04(14)       |           |
| O(3)–Dy(1)–O(6) | 136.27(10) | 81.77(13)       |           |
| O(4)–Dy(1)–O(5) | 82.00(10)  | 135.92(13)      |           |
| O(1)–Dy(1)–O(5) | 79.90(10)  | 77.35(13)       |           |
| O(3)–Dy(1)–O(5) | 141.20(9)  | 141.76(13)      |           |
| O(4)–Dy(1)–O(2) | 118.47(10) | 84.91(14)       |           |
| O(3)–Dy(1)–O(2) | 76.78(10)  | 79.04(14)       |           |
| O(6)–Dy(1)–O(2) | 78.57(10)  | 79.96(13)       |           |
| O(5)–Dy(1)–O(2) | 141.93(10) | 121.49(14)      |           |

**Table S2.** The selected bond lengths (Å) for reported analogs.

| Complexes                                   | Dy–O <sub>1</sub> | Dy–O <sub>2</sub> | Dy–O <sub>3</sub> | Dy–O <sub>4</sub> | Dy–O <sub>5</sub> | Dy–O <sub>6</sub> |
|---------------------------------------------|-------------------|-------------------|-------------------|-------------------|-------------------|-------------------|
| Dy(hfac) <sub>3</sub> (bpy) <sup>[1]</sup>  | 2.325(4)          | 2.314(4)          | 2.359(4)          | 2.354(4)          | 2.356(4)          | 2.354(4)          |
| Dy(TFI) <sub>3</sub> (bpy) <sup>[2]</sup>   | 2.315(6)          | 2.363(6)          | 2.328(6)          | 2.311(6)          | 2.359(6)          | 2.346(5)          |
| Dy(TTA) <sub>3</sub> (bpy) <sup>[3]</sup>   | 2.337(4)          | 2.297(4)          | 2.313(4)          | 2.346(4)          | 2.321(4)          | 2.342(4)          |
| Dy(acac) <sub>3</sub> (phen) <sup>[4]</sup> | 2.321(3)          | 2.309(3)          | 2.318(3)          | 2.335(3)          | 2.331(3)          | 2.324(3)          |
| Dy(TFI) <sub>3</sub> (phen) <sup>[2]</sup>  | 2.376(3)          | 2.315(3)          | 2.312(3)          | 2.347(3)          | 2.352(3)          | 2.312(3)          |
| Dy(TTA) <sub>3</sub> (phen) <sup>[3]</sup>  | 2.331(5)          | 2.319(5)          | 2.315(5)          | 2.346(5)          | 2.308(5)          | 2.321(5)          |
| Dy(acac) <sub>3</sub> (dpq)                 | 2.302(7)          | 2.313(7)          | 2.313(7)          | 2.319(7)          | 2.331(7)          | 2.375(7)          |
| Dy(acac) <sub>3</sub> (dppz)                | 2.291(13)         | 2.313(12)         | 2.313(12)         | 2.316(12)         | 2.325(12)         | 2.349(13)         |

**Table S3** The mononuclear dysprosium complexes based on β-diketonate ligands and auxiliary ligands behaving as SIM

| Complexes                                                | U <sub>eff</sub> | External field  | coordination geometry | Reference |
|----------------------------------------------------------|------------------|-----------------|-----------------------|-----------|
| [Dy(hfac) <sub>3</sub> (H <sub>2</sub> O) <sub>2</sub> ] |                  | No SMM behavior |                       | 36        |
| [Dy(hfac) <sub>3</sub> (bpy)]                            | 38.48 K          | 0 Oe            | D <sub>2d</sub>       | 39        |
| [Dy(TFI) <sub>3</sub> (H <sub>2</sub> O) <sub>2</sub> ]  |                  | No SMM behavior |                       | 14        |
| [Dy(TFI) <sub>3</sub> (bpy)]                             | 48.8 K           | 0 Oe            | D <sub>2d</sub>       | 14        |
| [Dy(TFI) <sub>3</sub> (phen)]                            | 57.9 K           | 0 Oe            | D <sub>4d</sub>       | 14        |
| [Dy(TTA) <sub>3</sub> (bpy)]                             | 58 K             | 0 Oe            | D <sub>4d</sub>       | 46        |
| [Dy(TTA) <sub>3</sub> (phen)]                            | 85 K             | 0 Oe            | D <sub>4d</sub>       | 46        |
| [Dy(d-tfc) <sub>3</sub> (bpy)]                           | 37 and 46 K      | 1000 Oe         | unknown               | 15        |
| [Dy(l-tfc) <sub>3</sub> (bpy)]                           | 37 and 49 K      | 1000 Oe         | unknown               | 15        |
| [Dy(d-tfc) <sub>3</sub> (phen)]                          | 31 K             | 1000 Oe         | unknown               | 15        |
| [Dy(l-tfc) <sub>3</sub> (phen)]                          | 25 K             | 1000 Oe         | unknown               | 15        |
| [Dy(tfnb) <sub>3</sub> (dppz)]                           | 65 K             | 0 Oe            | D <sub>4d</sub>       | 45        |
| [Dy(EIFD) <sub>3</sub> (bpy)]                            | 28.8 K           | 0 Oe            | D <sub>4d</sub>       | 20        |
| [Dy(EIFD) <sub>3</sub> (phen)]                           | 41.8 K           | 0 Oe            | D <sub>4d</sub>       | 20        |
| [Dy(EIFD) <sub>3</sub> (dpq)]                            | 41.7 K           | 450 Oe          | D <sub>4d</sub>       | 20        |
| [Dy(EIFD) <sub>3</sub> (dppz)]                           | 32.4 K           | 1500 Oe         | D <sub>4d</sub>       | 20        |
